# Supplementary material for: Optimizing the thermoelectric performance of n-type PbSe through dynamic doping driven by entropy engineering
Source: Royal Society of Chemistry journal article supplement (doi:10.1039/d4ta04290e), 2024-01-01

## Supporting Information

### Optimizing the Thermoelectric Performance of N-type PbSe through Dynamic Doping Driven by Entropy Engineering

Shujie Wu,<sup>a</sup> Changyuan Li,<sup>c</sup> Feida Chen,<sup>\*ab</sup> Kun Yang,<sup>ab</sup> Chengchao Hu,<sup>d</sup> Haihua Huang,<sup>d</sup> Wenjing Huang,<sup>a</sup> Xueli Zuo,<sup>a</sup> and Xiaobin Tang<sup>\*ab</sup>

<sup>a</sup> Department of Nuclear Science and Technology, Nanjing University of Aeronautics and Astronautics, Nanjing 211106, China.

<sup>b</sup> Key Laboratory of Nuclear Technology Application and Radiation Protection in Aerospace, Ministry of Industry and Information Technology, Nanjing 211106, China.

E-mail: fdchen@nuaa.edu.cn, tangxiaobin@nuaa.edu.cn

<sup>c</sup> Interdisciplinary Materials Research Center, School of Materials Science and Engineering, Tongji Univ., 4800 Caoan Rd., Shanghai 201804, China.

<sup>d</sup> School of Materials Science and Engineering, Liaocheng University, Liaocheng 252059, China.

## Supplementary details

**Figure S1.** Temperature-dependent thermal properties in  $\text{Pb}_{1-y}\text{Sn}_y\text{Se}_{1-x}\text{Te}_x\text{S}_x\text{-2at}\% \text{Cu}$  ( $x=0, y=0; x=0.1, y=0; x=0.25, y=0; x=0.25, y=0.125$ ) samples: (a) thermal diffusivity,  $D$ ; (b) specific heat capacity,  $C_p$ ; (c) Lorenz number,  $L$ ; (e) electronic thermal conductivity,  $\kappa_{\text{ele}}$ .

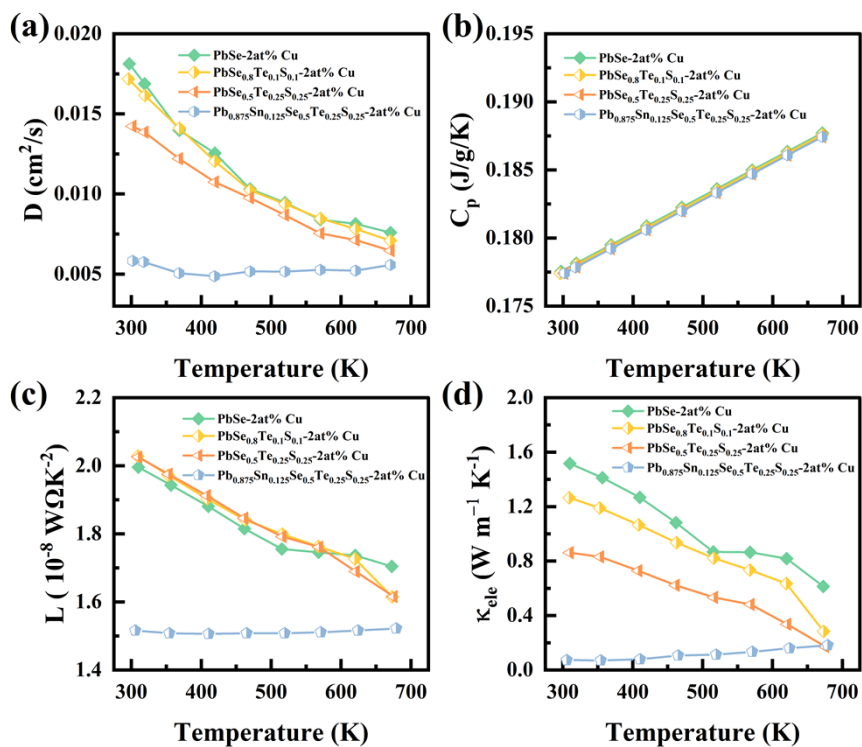

**Figure S2.** Electronic absorption spectra of the  $\text{PbSe-2at}\% \text{Cu}$  and  $\text{Pb}_{0.875}\text{Sn}_{0.125}\text{Se}_{0.5}\text{Te}_{0.25}\text{S}_{0.25}\text{-2at}\% \text{Cu}$ .

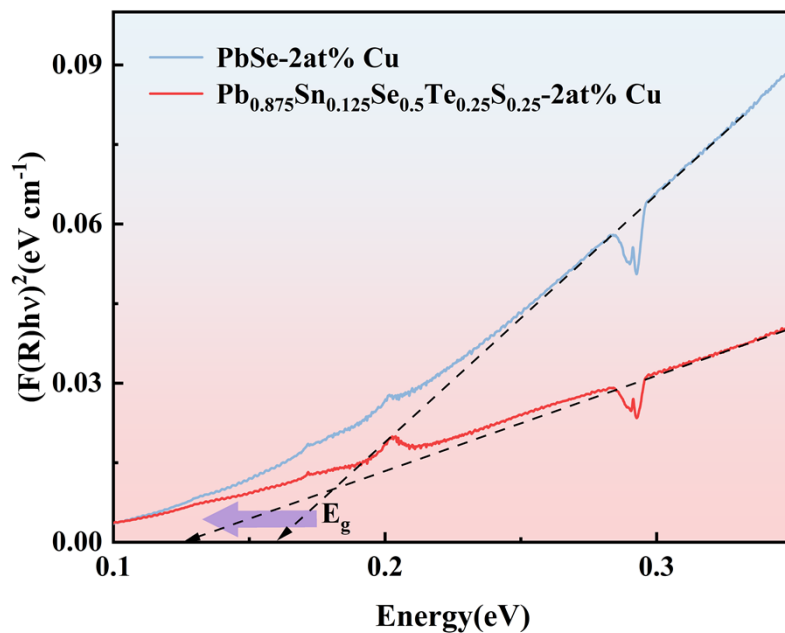

Supplement: d4ta04290e1.pdf [file d4ta04290e1.pdf]
